# 1 **Mathematical modelling of activation-induced heterogeneity reveals** 2 **cell state transitions underpinning macrophage responses to LPS**

3 **S. Dey<sup>1,2,3,4</sup>, D. Boucher<sup>2,4</sup>, J. W. Pitchford<sup>2,3</sup>, D. Lagos<sup>1,4,\*</sup>**

4

5 <sup>1</sup> Hull York Medical School, University of York, York, United Kingdom

6 <sup>2</sup> Department of Biology, University of York, York, United Kingdom.

7 <sup>3</sup> Department of Mathematics, University of York, York, United Kingdom.

8 <sup>4</sup> York Biomedical Research Institute, University of York, York, United Kingdom.

9

10 **\* Correspondence:**

11 Dimitris Lagos

12 dimitris.lagos@york.ac.uk

## 13 **Abstract**

14 Despite extensive work on macrophage heterogeneity, the mechanisms driving activation induced  
15 heterogeneity (AIH) in macrophages remain poorly understood. Here, we use two *in vitro* cellular  
16 models of LPS-induced tolerance (bone marrow-derived macrophages or BMDMs and RAW 264.7  
17 cells), single-cell protein measurements, and mathematical modelling to explore how AIH underpins  
18 primary and secondary responses to LPS. We measure expression of TNF, IL-6, pro-IL-1 $\beta$ , and  
19 NOS2 and demonstrate that macrophage community AIH is dependent on LPS dose. We show that  
20 altered AIH kinetics in macrophages responding to a second LPS challenge underpin hypo-  
21 responsiveness to LPS. These empirical data can be explained by a mathematical 3-state model  
22 including negative, positive, and non-responsive states (NRS), but they are also compatible with a 4-  
23 state model that includes distinct reversibly NRS and non-responsive permanently states (NRPS).  
24 Our mathematical model, termed NoRM (Non-Responsive Macrophage) model identifies similarities  
25 and differences between BMDM and RAW 264.7 cell responses. In both cell types, transition rates  
26 between states in the NoRM model are distinct for each of the tested proteins and, crucially,  
27 macrophage hypo-responsiveness is underpinned by changes in transition rates to and from NRS.  
28 Overall, our findings provide support for a critical role for phenotypically negative macrophage  
29 populations as an active component of AIH and primary and secondary responses to LPS. This  
30 reveals unappreciated aspects of cellular ecology and community dynamics associated with LPS-  
31 driven training of macrophages.

32

## 33 **1 Introduction**

34 Variability in gene expression in eukaryotic cells is required to allow communities of cells to switch  
35 from homeostatic to inducible states while responding to external cues (Blake et al., 2006; Eldar and  
36 Elowitz, 2010). Genetically identical populations show considerable cell-to-cell variability,  
37 particularly of proteins that are stress induced (Bar-Even et al., 2006; Newman et al., 2006). Studies  
38 on heterogeneity have found that expression of housekeeping genes tends to be normally (or log  
39 normally) distributed in apparently homogeneous populations (Kumar et al., 2014; Klein et al., 2015)  
40 while a subset of genes displays increased cell-to-cell variability with a bi-modal distribution (Shalek  
41 et al., 2013). Population heterogeneity plays a critical role in shaping immune responses. For

42 example, seemingly clonal populations of myeloid cells can produce effector cytokines  
43 heterogeneously. Several models of myeloid heterogeneity have been described, including bi-phasic  
44 transcription factor activation such as that of NF- $\kappa$ B and autocrine/paracrine effects of TNF or IL-1 $\beta$   
45 in response to TLR stimulation (Burns et al., 1998; Han et al., 2002; Caldwell et al., 2014; Hayden and  
46 Ghosh, 2014) and recently shown to be partly dependent on intercellular desynchronization of  
47 molecular clock (Allen et al., 2019). Interestingly, macrophage hypo-responsiveness to secondary  
48 stimulation has been associated with a switch in phenotype wherein, by a combination of TLR4  
49 attenuation, microRNA (miRNA)-mediated silencing expression, and chromatin modifications,  
50 macrophages lose their ability to make inflammatory proteins (Biswas and Lopez-Collazo,  
51 2009; Netea et al., 2015; Seeley and Ghosh, 2017) with alterations in chromatin accessibility being a  
52 more permanent cause for this phenomenon. In addition, macrophage hypo-responsiveness is driven  
53 by effects only on some genes while expression of others remains unaffected (Foster et al., 2007).  
54 Despite the above insight, the effect of primary or repeated stimulation on macrophage population  
55 heterogeneity, termed here as activation induced heterogeneity (AIH) and the underpinning  
56 molecular mechanisms remain elusive.

57 Here, we describe and quantify AIH within macrophage communities using two simple cellular  
58 systems of primary and secondary LPS challenge and measuring expression of four pro-inflammatory  
59 proteins. We built a mathematical model to propose and explore theoretical cellular states  
60 underpinning the empirically observed consistency of macrophage communities. Our analyses reveal  
61 that transitions to and from phenotypically negative or non-responding macrophage populations are  
62 critical determinants of macrophage AIH and responses to primary and secondary LPS challenge.

## 63 **Materials and Methods**

### 64 *Animals*

65 Female C57BL/6 CD45.2 mice were obtained from Charles River (UK). Animal care were regulated  
66 under the Animals (Scientific Procedures) Act 1986 (revised under European Directive 2010/63/EU).  
67 Mouse breeding was performed under a UK Home Office License (project licence number PPL  
68 60/4377) with approval from the University of York Animal Welfare and Ethical Review Body.

### 69 *Cell culture*

70 BMDMs were isolated from female C57BL/6 mice and differentiated in the presence of MCSF1  
71 (50ng/ml) for 6 days and then frozen at  $-70^{\circ}\text{C}$ . Frozen BMDM from half a mouse (1 tibia and 1  
72 femur) were plated and cultured in 10 mL of macrophage media in 100cm petri dishes for 2-3 days in  
73 the presence of MCSF1 before plating them on 24 well plates for experiments.

74 Both RAW264.7 cells and BMDMs were cultured in Dulbecco's Modified Eagle Medium (DMEM)  
75 supplemented with 1% streptomycin-penicillin mixture, 1% L-glutamine and 10% fetal calf serum  
76 (Hyclone). For experiments using BMDM, MCSF1 was added in the cell culture media and kept for  
77 the duration of the experiment.

78 RAW 264.7 cells, a monocyte/macrophage-like cells, originating from Abelson leukemia virus  
79 transformed cell line derived from BALB/c mice, were detached for passaging using 1x Trypsin-  
80 EDTA (Invitrogen) by incubating at  $37^{\circ}\text{C}$  for 10 minutes. Cells were detached completely by gently  
81 scraping with cell scraper with a cross-ribbed handle (VWR). Upon reaching 70-80% confluency,  
82 cells were harvested and plated in 24 well plates. BMDMs were detached by gentle pipetting up and  
83 down using ice cold 1X PBS (Gibco). Cells were centrifuged (1500RPM for RAW264.7 and  
84 1300RPM for BMDMs) at room temperature for 5 minutes for the purposes of washing or re-  
85 suspending.

86  
87

88 *LPS challenge*

89 LPS from *Escherichia coli* serotype 055:B5 (Sigma-Aldrich, L2880) was used. This is a phenol  
90 extracted LPS with <3% protein impurity. 200-250,000 RAW264.7 cells or BMDMs were plated  
91 overnight before experiments. All cells were plated in a Corning 24 well plate in 500ul of DMEM.  
92 For LPS titration experiments, cells were either stimulated with LPS or were left in media (untreated)  
93 on day 1. Cells were challenged with 1, 10, 100 or 1000 ng/ml of LPS. Supernatant was collected at  
94 24 hours and stored at -20°C. Cells were harvested for flow cytometry at 16 or 24 hours from LPS  
95 stimulus.

96 For inducing hypo-responsiveness, cells were either stimulated with 10 or 1000 ng/ml of LPS or left  
97 untreated in media on day 0. After 24 hours (day 1), cells were washed twice with PBS and replaced  
98 with media (Media/Media) or with media containing 1000 ng/ml of LPS (10/1000; 1000/1000 or  
99 Media/1000).

100

101 *Flow Cytometry*

102 RAW264.7 cells of BMDMs were collected after washing in ice-cold PBS and then detaching the  
103 cells with Accutase (BioLegend). Prior to collection, cells were incubated in 10ug/ml of BFA  
104 (Brefeldin A, Sigma). BFA was added to the culture four hours prior to harvest for staining.

105 Cells and all reagents were maintained at 4°C throughout the intra-cellular staining protocol.  
106 Harvested cells were washed twice in PBS and re-suspended in approximately 50ul of PBS. Cells  
107 were stained with 100ul of 1:1000 Zombie Aqua live/dead stain (BioLegend) in PBS on ice for 8-10  
108 minutes in the dark. F<sub>c</sub> receptors were blocked with 5ul of 2mg/ml rat IgG for five minutes. Cells  
109 were fixed with BD Cytotfix and permeabilized with BD Cytoperm. Intracellular staining was  
110 performed with the cocktail of antibodies made in permeability buffer. BV421-TNF (MP6-XT22;  
111 BioLegend), APC-IL6 (MP5-20F3; BioLegend, eFluor 610-NOS2 (CXNFT; ThermoFisher  
112 Scientific), PE- pro-IL-1 $\beta$  (NJTEN3, ThermoFisher Scientific), FITC-F4/80 (BM8, BioLegend) and  
113 PE-Cy7 CD11b (M1/70, BioLegend) were used for staining RAW264.7 cells. BMDMs and  
114 RAW264.7 cells were pre-gated on live cells, singlets, forward scatter, and side scatter (for gating  
115 intact cells), F4/80+ and/or CD11b for an average of 100,000 cells were collected per treatment.

116

117 *ELISA and Greiss Assay*

118 IL-6, TNF and IL-1 $\beta$  concentrations in the cell culture supernatant were measured by enzyme-linked  
119 immunosorbent assay (ELISA) using BioLegend's ELISA MAX Standard. Manufacturer's  
120 recommended protocol was followed. Absorbance was read at 450nm with a wavelength correction  
121 at 570nm using a VersaMax Microplate Reader (Molecular Devices). Standard curves were generated  
122 using 4-parameter non-linear fitting to known standard concentrations using SoftMax Pro software.  
123 Optical density of the unknowns that fit within the linear range of the standard curve was used to  
124 calculate the concentration of the sample.

125 Greiss assay was used to measure nitrite concentrations in the supernatants. Diazotization reaction in  
126 Greiss assay was carried out as per manufacturer's instructions (Promega). Plates were read on  
127 VersaMax microplate reader capturing absorbance between 520 and 550nm.

128

129

130 *Mathematical Modelling*

131 Bespoke MATLAB code, NoRM, was written to implement stochastic simulations using the Doob-  
132 Gillespie algorithm. Parameter estimation of stochastic models were carried out by running the  
133 NoRM model with 10<sup>5</sup>-10<sup>6</sup> sets of randomly generated parameter sets from a mixture of negative  
134 binomial, uniform, and normal distributions. The key transition rates ( $\alpha$ ,  $\beta$ ,  $\beta_2$ ,  $\gamma_1$ ,  $\gamma_2$ ) were estimated  
135 using rejection sampling. The unitless  $\mu$  (co-efficient for modelling LPS dynamics), was adjusted  
136 between the range of 0.1-100 to account for sensitivity to LPS for the four different proteins. The

137 LPS decay rate,  $\delta$ , was arbitrarily chosen and fixed at 0.5; model outcomes were qualitatively  
138 unaffected by this choice. Selection of parameters that explained empirical datasets was performed  
139 by rejection sampling based Akaike Information Criterion (AIC), with particular attention being paid  
140 to the key transition rates ( $\alpha$ ,  $\beta$ ,  $\beta_2$ ,  $\gamma_1$ ,  $\gamma_2$ ). The modelling process is described in detail in the  
141 **Supplementary Material under “Supplementary text: Modelling Process”**.

142  
143 *Statistics*

144 All experiments were performed in at least three biological replicates. BMDM experiments were  
145 performed with macrophages from at least three mice. Statistical analysis was done using Graphpad  
146 Prism 6, Matlab and R. Treatment groups were compared using unpaired Student’s t-test.

147

## 148 **Results**

### 149 **Macrophage community AIH is dependent on LPS dose**

150 To capture distinct macrophage subpopulations upon activation with LPS we measured protein  
151 expression of three cytokines, TNF, pro-IL-1 $\beta$  and IL-6, and one intracellular pro-inflammatory  
152 protein NOS2, an enzyme that catalyzes nitric oxide formation. We selected these factors as they are  
153 all inducible upon LPS challenge. Furthermore, heterogeneity in TNF and IL-1 $\beta$  secretion in  
154 populations can be a result of bi-phasic NF-kB activation (Tay et al., 2010). IL-6 and NOS2 are also  
155 up-regulated due to LPS (Farlik et al., 2010; Tanabe et al., 2010). Also, all these proteins have been  
156 implicated in LPS-induced macrophage hypo-responsiveness. To study AIH, we focused on the early  
157 stages (within the first 24h) post-primary or secondary stimulation with LPS to minimise  
158 confounding effects of secondary and tertiary cytokine-mediated effects.

159 First, we selected RAW264.7 cells as a cellular model. These cells are thought to be a model of  
160 primary bone-marrow derived macrophages with regards to expression of surface receptors and the  
161 response to microbial ligands (Berghaus et al., 2010). We reasoned that using a macrophage cell line  
162 to study AIH also reduced the level of starting population heterogeneity in comparison to that we  
163 would observe using primary macrophages. The community composition of LPS stimulated  
164 RAW264.7 cells was represented graphically by charting the 16 possible sub-populations by adapting  
165 the Simplified Presentation of Incredibly Complex Evaluations (SPICE) method (Roederer et al.,  
166 2011), with each slice representing a subpopulation (**Figure 1A, B**) with positive fractions selected  
167 based on appropriate isotype controls (supplementary **Figure S1A**). Consistent with the concept of  
168 AIH, we found that the dose of LPS can have qualitative effects on the diversity of the response;  
169 quadruple positive and TNF negative triple positive (TNF-proIL1 $\beta$ +IL6+NOS2+) cells appear  
170 prominently at higher doses of LPS (100, 1000 ng/ml; **Figure 1B**), while quadruple negative (TNF-  
171 pro-IL1 $\beta$ -IL6-NOS2-) sub-populations and single positive cells for TNF (TNF+pro-IL1 $\beta$ -IL6-NOS2-  
172 ) appear at lower doses (1, 10 ng/ml; **Figure 1B**). Despite heterogeneous compositions of low and  
173 high dose of LPS, double-positive TNF-proIL1 $\beta$ +IL6-NOS2+ cells were a part of all LPS doses with  
174 little variability (1, 10, 100, 1000 ng/ml; **Figure 1B**) suggesting the presence of sub-populations with  
175 differential dependence on the magnitude of LPS dose.

176 Next, we explored AIH in BMDMs, a cell model more faithfully capturing heterogeneity of primary  
177 macrophages. As in the case of RAW264.7 cells, exposure to LPS induced population heterogeneity  
178 in BMDMs albeit with different kinetics to that observed in RAW264.7 cells (compare **Figure 2** with  
179 **Figure 1B**). Whereas all populations were observed at 16h (12h stimulation followed by 4h of BFA  
180 treatment) post-stimulation in RAW264.7 cells, in BMDMs this was the case at earlier timepoints but  
181 not at 16h. Notably, the percentage of TNF-positive BMDMs peaked at 4h post stimulation,  
182 demonstrating a faster TNF response in BMDMs in comparison to RAW264.7 cells. In BMDMs,

183 single positive cells for NOS2+ cells (TNF-pro-IL1 $\beta$ -IL6-NOS2+) increased while single positive  
184 cells for pro-IL1 $\beta$  (TNF-pro-IL1 $\beta$ +IL6-NOS2-) decreased with increasing magnitude of LPS dose at  
185 all time points (**Figure 2**). Further, quadruple negative sub-population (TNF-pro-IL1 $\beta$ -IL6-NOS2-)  
186 did not show a clear increase with a lower LPS dose as in RAW264.7 cells suggesting that the  
187 appearance of these sub-populations is more nuanced in BMDMs. While higher frequency of  
188 quadruple negative cells in 1ng/ml versus 10ng/ml could reflect differences in responses to  
189 increasing amounts of LPS the increased quadruple negative sub-population frequency in 100 and  
190 1000ng/ml concentration may be due to a fast response accompanied by an immediate switch to a  
191 non-responding phenotype.

192 Overall, our findings indicated that exposure to LPS induced population heterogeneity in macrophage  
193 communities for both a macrophage cell line (RAW264.7 cells) and primary BMDMs. As expected,  
194 cell-type specific differences were observed with BMDM responses occurring and peaking faster and  
195 reaching a plateau at lower LPS concentrations. These could be linked to differential sensitivity to  
196 LPS, but also differential pre-existing population heterogeneity between BMDMs and RAW264.7  
197 cells. Regardless of these differences in kinetics our findings demonstrated that upon primary LPS  
198 challenge, AIH occurs in macrophages in an LPS-dependent manner.

199

### 200 **Altered AIH kinetics in response to a second LPS challenge underpin macrophage hypo-** 201 **responsiveness**

202 Next, we tested how changes in macrophage community compositions in RAW264.7 cells compare  
203 between macrophages challenged with LPS for a second time and macrophages responding to a first  
204 LPS stimulus. We obtained temporal snapshots of RAW264.7 cell communities responding to LPS  
205 alongside LPS responses of communities that were pre-exposed to varying LPS doses (**Figure 3A**  
206 **and Supplementary Figure 1B**). At the population level, cumulative secreted levels of TNF, IL-6,  
207 and NO were reduced for RAW264.7 cells (**Supplementary Figure 1C**), supporting that the LPS  
208 pre-treatment compromised the ability of cells to respond to a second LPS challenge. At the  
209 community level, single-cell measurements revealed that pre-treated macrophage community  
210 consistency (10/1000 and 1000/1000) differed to that seen during primary challenge (Media/1000) at  
211 8h and 12h post stimulation but not at 16h (**Figure 3A**). For example, pre-treated macrophages were  
212 characterised by a prominent TNF-pro-IL1 $\beta$ +IL6-NOS2+ population but reduced TNF+ populations  
213 at the earlier stages of the response. This suggested that LPS-induced hypo-responsiveness is  
214 underpinned by different starting community compositions and altered community evolution  
215 trajectories, but not a different endpoint community composition.

216 In BMDMs, LPS-induced hypo-responsiveness was observed for cells pre-treated with 1000ng LPS  
217 for cumulative secreted levels of TNF, IL6, NO, and IL1 $\beta$  (**Figure S2A**). IL1 $\beta$  secretion was only  
218 observed in BMDMs pre-treated with 10ng LPS, in agreement with the known requirement of a  
219 priming step for pro-IL1 $\beta$  processing and IL1 $\beta$  secretion (Eder, 2009; Lopez-Castejon and Brough,  
220 2011). BMDMs pre-treated with 1000ng LPS failed to produce secreted IL1 $\beta$  (**Figure S2A**), further  
221 supporting their hypo-responsive phenotype. At the single-cell level, despite increased levels at  
222 early timepoints (0-4hr) for NOS2 and pro-IL1 $\beta$ , we observed reduced expression of all measured  
223 proteins at 12 hours post stimulation of BMDMs pre-treated with 1000ng LPS (**Supplementary**  
224 **Figure S2B, C**) and increased quadruple negative population at all timepoints (**Figure 3B**). Having  
225 observed the kinetic differences between RAW264.7 cells and BMDMs upon primary LPS challenge  
226 (**Figures 1 and 2**), we explored an earlier time point in BMDM response (0-4hr in BFA). Indeed,  
227 93% of all BMDMs also undergo an TNF+ state after which a fraction continues to be in the TNF+  
228 sub-populations and a fraction that switches off (0-4hr BFA versus 4hr +4hr BFA in Media/1000  
229 group). This finding is also in line with TNF being an early response protein (Bradley, 2008) and  
230 shaping macrophage community structure (Caldwell et al., 2014). As in the case of RAW264.7 cells,

231 we observed more striking community differences during the early timepoints of the response (4hr +  
232 4hr BFA and 8h + 4hr BFA) between pre-treated and control BMDMs. The end-point compositions  
233 (8h + 4hr BFA) were less distinct, although we note that in BMDMs, LPS pre-treatment resulted in  
234 an increase in quadruple negative cell populations and a reduction in TNF+ populations in LPS-  
235 pretreated cells at 12h post challenge (**Figure 3B**).  
236 Interestingly, in the 10/1000 community 76% RAW264.7 cells (4hr+4hr BFA, **Figure 3A**; 68%  
237 BMDMs at 0-4hr, **Figure 3B**) were positive for TNF and hypo-responsiveness was most pronounced  
238 in the 1000/1000 community with just 8% BMDMs and 18% RAW264.7 cells being TNF+ in the  
239 first four and eight hours of the response respectively (**Figure 3**). Furthermore, in both BMDMs and  
240 RAW264.7 cells and at the earliest timepoints, the 10/1000 community showed a higher percentage  
241 of TNF+ cells than the 1000/1000 community that switch off rapidly to 45% for RAW264.7 cells and  
242 26% for BMDMs at 12 and 8 hours respectively suggesting that a lower dose pre-stimulus decreases  
243 the capability of a population of cells to switch on TNF in response to a higher dose pre-stimulus.  
244 Furthermore, RAW264.7 communities of 10/1000 and 1000/1000 comprised of 5% and 2% negative  
245 sub-population respectively, confirming again that a small percentage of cells do not respond to the  
246 second dose of LPS. In addition, while overall TNF+ cells decrease over 8, 12 and 16 hours post LPS  
247 stimulus, the numbers of overall TNF+ cells first decrease (between 8 and 12 hours) then increase  
248 (between 12 and 16 hours) in RAW264.7 1000/1000 communities (**Figure 3A**). This suggested that a  
249 subset of cells can become positive for TNF later in response to the secondary stimulus.  
250 Interestingly, in BMDMs it is the single positive NOS2 sub-population (TNF-pro-IL1 $\beta$ -IL6-NOS2+) and the double positive sub-population TNF-pro-IL1 $\beta$ +IL6-NOS2+ that dominates (41% and 34%  
251 respectively, **Figure 3B 0-4hr**) the first 4 hours of response in the 1000/1000 community compared  
252 with the Media/1000 community (**Figure 3B 4hr**). Similar to BMDMs, in RAW264.7 cells, the  
253 1000/1000 community response in the first 8 hours also comprised of single positive NOS2 (20%,  
254 4+4hr BFA **Figure 3A**) and double positive TNF-pro-IL1 $\beta$ +IL6-NOS2+ (57%, 4+4hr BFA **Figure**  
255 **3A**). IL-6+ sub-populations were consistently reduced at all timepoints when compared between the  
256 Media/1000 and the 1000/1000 communities (**Figure 3B, Supplementary Figure S2**).  
257 Overall, these results demonstrated that for both RAW264.7 cells and BMDMs, pre-exposure of  
258 macrophages to low or high LPS doses resulted in altered AIH kinetics during a secondary LPS  
259 challenge in comparison to macrophages receiving a primary LPS challenge. Endpoint community  
260 compositions showed modest differences between cells responding to one or two LPS challenges.  
261 The observed secreted protein hypo-responsiveness phenotype was predominantly reflected in the  
262 altered kinetics of changes in community composition upon LPS stimulation. Our data indicated that  
263 a critical part of the community response to LPS occurred in the first 8-12 hours for RAW264.7 cells  
264 and 4-8 hours for BMDMs of the primary challenge, suggesting that at later time points a proportion  
265 of cells might be non-responsive in a reversible or permanent manner. We note that the effects were  
266 different for each of the measured proteins (**Figure 3**), suggesting that protein-specific mechanisms  
267 were involved in LPS-induced hypo-responsiveness.

### 269 **Transitions between distinct non-responding macrophage subsets underpin responses to LPS**

270 To complement our empirical studies and understand how AIH contributes towards macrophage  
271 responses to LPS, we constructed conceptual mathematical models. At the heart of these models is  
272 the idea that any individual cell may make a transition from a non-protein producing state to a protein  
273 producing state (termed “negative” and “positive” states hereafter). These transitions occur at random  
274 in continuous time, and the probability (per unit time) of transition depends on the current  
275 environment of a cell such as the presence or absence of antigen (**Figure 4A, Supplementary text:**  
276 **Modelling Process**). The simplest models restricted each cell to be in a negative or a positive state  
277 only. While these models were found to be useful to understand antigen (LPS) dependent switching  
278 on and off for each individual protein independently (Eq 7, **Supplementary text: Modelling**  
279

280 **Process**), they failed to describe the ability of a subset of cells to become hypo-responsive that was  
281 suggested by our empirical studies without explicitly changing the rate at which a negative  
282 population switched to positive (**Supplementary text: Modelling Process**). Therefore, we refined  
283 the model by allowing two further cell states which reflect the empirical observations. Explicitly, we  
284 allowed the possibility that a positive cell could switch to a third non-responsive state (NRS, **Figure**  
285 **4B**), generating a 3-state model. In addition, we also explored the possibility that cells in the NRS  
286 may make one of two transitions, either to a fourth, non-responsive permanently state (NRPS, **Figure**  
287 **4C**) or back to the negative cell state, generating a 4-state model. Models were implemented using  
288 the Doob-Gillespie algorithm and were checked for faithfulness to the mean-field solution  
289 (**Supplementary Figure S3A**).

290 We termed our overall modelling approach the “non-responsive macrophage” (NoRM) model  
291 (**Figure 4**). We stress that the purpose of these models was not to predict detailed physiological  
292 transitions or identify mechanisms. Rather, they offered a framework within which to interpret our  
293 empirical datasets and alluded to simple explanations for observed phenomena across a range of  
294 experimental conditions. In this context, we note that in the NoRM model, all cells were expected to  
295 respond to LPS treatment. This assumption also captured cells that might never respond to LPS by  
296 transitioning from positive to non-responsive states almost immediately upon stimulus.

### 297 298 **A 3-state NoRM model is sufficient to explain macrophage hypo-responsiveness**

299 Using rejection sampling, we tested whether the 3- or 4-state NoRM models could independently  
300 capture our empirical data for each of the measured proteins. Based on the AIC values comparing  
301 model fit to estimated parameters, a 3-state NoRM model is sufficient to explain our empirical data  
302 (**Supplementary Figure S3B**). We next compared model outputs for proportion of cells in the  
303 positive state over time for the 3-state and 4-state NoRM model both of which predict hypo-  
304 responsiveness of the population (**Supplementary Figure S4**). The output from the models was used  
305 to predict the composition of positive, negative, NRS and/or, in the case of the 4-state model, NRPS  
306 for each of the four proteins. Based on the estimated parameters, our model predicted that the total  
307 proportion of non-responsive cell-states (NRS and/or NRPS) increased post primary LPS stimulus  
308 (**Figure 5, Figure S5**) and therefore contributed to the diminished response by the population in the  
309 second challenge of LPS for all proteins (**Figure S4**) except NOS2 in both cellular models (**Figure**  
310 **S4B** and as seen in the empirical data shown in **Figure 3A**).

311  
312 Upon comparing the *in-silico* 3-cell-state composition for each of the inflammatory protein,  
313 differences and similarities between BMDM and RAW264.7 cells were visible at 12 and 16 hours of  
314 primary *in-silico* stimulus between TNF, IL-6, pro-IL1 $\beta$  and NOS2 (**Figure 5, Supplementary**  
315 **Figure S5, 3-state**). The stimulus length was interpreted based on the empirical results in **Figures 1,**  
316 **2 and 3**. For TNF (3-state, **Figure 5A**), BMDMs had a higher frequency of cells in the NRS than  
317 RAW264.7 cells (60% versus 43%) but despite this both maintained a proportion of cells in the  
318 negative state (15% versus 21%). This was compatible with the possibility of a fraction of cells  
319 remaining negative but capable of responding at later timepoints. In the case of TNF, when the  
320 negative state to NRS ratio is calculated in BMDMs, about 1 in 2 of phenotypically negative cells  
321 (for a single protein) can respond to LPS while in RAW264.7 cells this decreases to 1 in 4 suggesting  
322 that RAW264.7 cells may show greater sensitivity to becoming TNF+ later into the stimulus. In a  
323 similar but with opposite manner, for pro-IL-1 $\beta$  RAW264.7 cells have negative to NRS ratio less  
324 than 1:24 at 16 hours (3-state, **Figure 5B**) while the same ratio is greater than 1 in BMDMs. While  
325 this could be due to the large difference in positive pro-IL-1 $\beta$  cells in RAW264.7 versus BMDM, it  
326 suggested that up to 34% BMDMs remained antigen (LPS) responsive. Interestingly, the 3-state  
327 NoRM model suggested similar IL-6 dynamics showing that BMDMs maintained a large negative to  
328 NRS ratio after primary (54% negative to 41% NRS) and secondary (52% negative to 43% NRS)

329 LPS stimulation (**Supplementary Figure S5**). The above observations demonstrated differences  
330 between the two cellular models and their responsiveness to LPS.  
331 While the 3-state model was sufficient to explain our experimental data points, it did not differentiate  
332 between temporary non-responsiveness and permanent epigenetic cessation of activity (Seeley and  
333 Ghosh, 2017). To explore how these states might vary between proteins and cell types, we also  
334 analysed the 4-state representation of the NoRM model (**Figure 5, supplementary Figure S5, 3-**  
335 **state**). The NRS to NRPS ratio varied greatly between different proteins after the primary (12 hour  
336 for BMDM and 16 hour for RAW264.7) and secondary (24hr primary + 12hr/16hr secondary for  
337 BMDM and RAW264.7 respectively) dose of LPS (*in silico*). TNF NRPS frequencies were almost 3  
338 times higher than pro-IL-1 $\beta$  in both cellular models. On the other hand, IL-6 NRPS frequency was  
339 comparable to TNF NRPS frequency in RAW264.7 but lower (1:3) in BMDMs. Further, in  
340 RAW264.7 cells, NOS2 NRPS frequency was less than 1% even after secondary stimulus while in  
341 BMDMs this was 5%. The increase in NRPS for any single protein over a subsequent stimulation,  
342 however, was consistent for all proteins. This suggested that while some proteins switched off faster  
343 in single cells over a course of stimulation, if stimulation remained (i.e. until LPS>0 in the model) the  
344 system would progress to all cells becoming non-responsive permanently (NRPS) given  $\gamma_2 \neq 0$ .  
345 Furthermore over the course primary/secondary stimulus (within our modelling timeframe), BMDMs  
346 consistently comprised of fewer cells in the NRPS than RAW264.7 cells for TNF, pro-IL-1 $\beta$  and IL-  
347 6 with the exception of NOS2 where BMDM communities had higher NRPS frequency.  
348 Taken together, analysis of the NoRM model demonstrated that the existence of one non-responsive  
349 macrophage cell state is necessary to explain the observed empirical data. However, a 4-state model  
350 including distinct reversible and permanently non-responsive macrophage cell states was also  
351 compatible with the empirical data and captured differences between a model macrophage cell line  
352 (RAW264.7 cells) and primary macrophages (BMDMs).

## 354 Discussion

355 Heterogeneity is a hallmark of immune cell populations (Sallusto and Lanzavecchia, 2009; Satija and  
356 Shalek, 2014; Guillems et al., 2018; Papalexis and Satija, 2018). Understanding the mechanisms  
357 driving this heterogeneity can reveal how it can be modulated to prevent immunopathology or boost  
358 immunity when necessary (Gogos et al., 2000; Rittirsch et al., 2008; Hotchkiss et al., 2013; Davenport  
359 et al., 2016). In this context, macrophages pre-exposed to LPS show a dampened immune response  
360 when re-stimulated with LPS. This effect is physiologically relevant in the appearance of an  
361 immuno-suppressive phase in sepsis and is associated with increased mortality (Biswas and Lopez-  
362 Collazo, 2009). Our results reveal that analysis of only a small number of pro-inflammatory proteins  
363 combined with simple mathematical models can provide powerful insight into the functional  
364 relevance of macrophage AIH. We show how single cells show considerable heterogeneity in  
365 production and co-expression of TNF, IL-1 $\beta$ , IL-6, or NOS2, underpinned by functionally distinct  
366 non-responsive states. It is of note that although both AIH and non-responsiveness are concepts that  
367 have been long used in T cell responses (Schwartz, 2003; Zhu and Paul, 2010), their application and  
368 understanding in macrophage responses is profoundly lacking. Our results suggest that heterogeneity  
369 in terms of community composition is maintained in hypo-responsive macrophage communities  
370 despite the overall lower response and that, at least for a subpopulation of cells, the apparent lack of  
371 response is reversible. In our study we measured protein levels of selected key inflammatory  
372 mediators using BFA and obtained consistent results in two different macrophage models. Further  
373 studies, using single cell proteomics and transcriptomics can be used to define the key molecular  
374 features of non-responsive macrophage subsets within a population responding to antigen *in vitro* and  
375 *in vivo* and the molecular regulators driving transitions between responding and non-responding



376 macrophage communities. Using ultra-pure LPS in these studies will allow for accurate  
377 determination of quantitative effects of AIH. Identifying molecular mechanisms that favor or repress  
378 the generation of permanently non-responsive macrophage population can have far-reaching  
379 implications for treatment and understanding of infectious, inflammatory, and autoimmune diseases.  
380 Similarly, with regards to the mathematical modelling approach, we note that while generating  
381 accurate predictions of temporal evolution of protein positivity was not a primary purpose of the  
382 NoRM model, it provides a framework to which linear or non-linear constraints to  $\mu$  (LPS co-  
383 efficient) and  $\delta$  (LPS decay) can be added to model generalised protein positivity at  
384 phenomenological levels. This would allow to model primary and secondary effects at objective level  
385 generating simple parameters to test in laboratory experiments.

386  
387 Both our empirical and theoretical analysis of macrophage AIH highlighted differences between  
388 RAW264.7 cells and primary BMDMs, for example with regards to kinetics of activation. This is in  
389 agreement with proteomics and transcriptomics studies comparing BMDMs with macrophage-like  
390 cell lines (Guo et al., 2015;Levenson et al., 2018) indicating differential kinetics and maximum  
391 magnitude of responses. Differences in pre-existing genetic heterogeneity and signaling and  
392 transcriptional networks between the two cell types are likely sources for these differences. However,  
393 there also notable similarities between the two cellular models. For example, in both models  
394 macrophages that are challenged with LPS for a second time respond through distinctly different  
395 community composition trajectories than those observed in cells that respond to LPS for the first  
396 time. Similarly, in the 4-state NoRM model, for both cell types LPS-induced hypo-responsiveness  
397 post-secondary challenge is associated with an increase in NRPS. This concurs with reports  
398 highlighting that non-reversible mechanisms leading to permanent changes within the cell, such as  
399 chromatin remodeling, are critical for induction of endotoxin tolerance (Seeley and Ghosh, 2017). In  
400 a biological context, the NRS can be considered as arising from sufficient but temporary effects such  
401 as post-transcriptional attenuation of the TLR4 pathway and/or miRNA induced, while the NRPS  
402 might represent longer heritable epigenetic modifications (Nomura et al., 2000;Chan et al.,  
403 2005;Quinn et al., 2012;Seeley and Ghosh, 2017;Vergadi et al., 2018). Overall, it is important to  
404 note the value of our approach in revealing cellular ecology and community dynamics aspects that  
405 align with molecular and phenotypic insights into training of macrophages (Saeed et al., 2014;Netea  
406 et al., 2016).

407  
408 Variability in gene expression in eukaryotic cells (McAdams and Arkin, 1997;Elowitz et al.,  
409 2002;Paulsson, 2004) often has phenotypic consequences (Blake et al., 2006;Eldar and Elowitz,  
410 2010). Innate immune response to stimulus has been shown to be heterogeneous in mammalian  
411 immune cells (Shalek et al., 2013;Satija and Shalek, 2014). This is most notable in the high  
412 transcriptional variability of cytokines, such as TNF, IL-1 $\beta$ , and IL-6, and their receptors upon  
413 stimulus in LPS stimulated phagocytes (Hagai et al., 2018). *In vivo*, the source of macrophage  
414 population heterogeneity could be driven by developmental, tissue or niche, and activation associated  
415 factors. Furthermore, it can be amplified or suppressed through interaction with other immune or  
416 non-immune cells (Yao et al., 2018). Our study explored macrophage AIH exclusively *in vitro* using  
417 relatively homogeneous starting cell populations to concentrate on cell-intrinsic mechanisms.  
418 Nevertheless, it is likely that our theoretical model only partially captures population heterogeneity  
419 occurring in more complex macrophage populations or *in vivo*. However, we speculate that the key  
420 concepts revealed by our findings including AIH dose dependence, existence of reversible and  
421 permanently non-responsive states, and a critical role for transitions between these states as  
422 determinants of macrophage function will be relevant to a broad range of pathophysiological contexts  
423 in the immune system.

## 424 **2 Conflict of Interest**

425 The authors declare that the research was conducted in the absence of any commercial or financial  
426 relationships that could be construed as a potential conflict of interest.

## 427 **3 Author Contributions**

428 D.L. and J.W.P. conceived and supervised the project. S.D., D.B., J.W.P., and D.L. designed  
429 experiments and analysis pipelines. S.D. performed and analysed experiments, developed the  
430 mathematical model. All authors co-wrote the manuscript.

## 431 **4 Funding**

432 The study was funded by the “Combating Infectious Disease: Computational Approaches in  
433 Translational Science” Wellcome Trust PhD programme (WT095024MA).

## 434 **5 Acknowledgments**

435 We thank staff at the Imaging and Cytometry Lab in the University of York Bioscience Technology  
436 Facility for technical support and advice.

## 437 **6 References**

- 438 Allen, N.C., Philip, N.H., Hui, L., Zhou, X., Franklin, R.A., Kong, Y., and Medzhitov, R. (2019).  
439 Desynchronization of the molecular clock contributes to the heterogeneity of the inflammatory  
440 response. *Sci Signal* 12.
- 441 Bar-Even, A., Paulsson, J., Maheshri, N., Carmi, M., O'shea, E., Pilpel, Y., and Barkai, N. (2006).  
442 Noise in protein expression scales with natural protein abundance. *Nat Genet* 38, 636-643.
- 443 Berghaus, L.J., Moore, J.N., Hurley, D.J., Vandenplas, M.L., Fortes, B.P., Wolfert, M.A., and Boons,  
444 G.J. (2010). Innate immune responses of primary murine macrophage-lineage cells and RAW 264.7  
445 cells to ligands of Toll-like receptors 2, 3, and 4. *Comp Immunol Microbiol Infect Dis* 33, 443-454.
- 446 Biswas, S.K., and Lopez-Collazo, E. (2009). Endotoxin tolerance: new mechanisms, molecules and  
447 clinical significance. *Trends Immunol* 30, 475-487.
- 448 Blake, W.J., Balazsi, G., Kohanski, M.A., Isaacs, F.J., Murphy, K.F., Kuang, Y., Cantor, C.R., Walt,  
449 D.R., and Collins, J.J. (2006). Phenotypic consequences of promoter-mediated transcriptional noise.  
450 *Mol Cell* 24, 853-865.
- 451 Bradley, J.R. (2008). TNF-mediated inflammatory disease. *J Pathol* 214, 149-160.
- 452 Burns, K., Martinon, F., Esslinger, C., Pahl, H., Schneider, P., Bodmer, J.L., Di Marco, F., French,  
453 L., and Tschopp, J. (1998). MyD88, an adapter protein involved in interleukin-1 signaling. *J Biol*  
454 *Chem* 273, 12203-12209.
- 455 Caldwell, A.B., Cheng, Z., Vargas, J.D., Birnbaum, H.A., and Hoffmann, A. (2014). Network  
456 dynamics determine the autocrine and paracrine signaling functions of TNF. *Genes Dev* 28, 2120-  
457 2133.
- 458 Chan, C., Li, L., McCall, C.E., and Yoza, B.K. (2005). Endotoxin tolerance disrupts chromatin  
459 remodeling and NF-kappaB transactivation at the IL-1beta promoter. *J Immunol* 175, 461-468.

- 460 Davenport, E.E., Burnham, K.L., Radhakrishnan, J., Humburg, P., Hutton, P., Mills, T.C., Rautanen,  
461 A., Gordon, A.C., Garrard, C., Hill, A.V., Hinds, C.J., and Knight, J.C. (2016). Genomic landscape  
462 of the individual host response and outcomes in sepsis: a prospective cohort study. *Lancet Respir*  
463 *Med* 4, 259-271.
- 464 Eder, C. (2009). Mechanisms of interleukin-1beta release. *Immunobiology* 214, 543-553.
- 465 Eldar, A., and Elowitz, M.B. (2010). Functional roles for noise in genetic circuits. *Nature* 467, 167-  
466 173.
- 467 Elowitz, M.B., Levine, A.J., Siggia, E.D., and Swain, P.S. (2002). Stochastic gene expression in a  
468 single cell. *Science* 297, 1183-1186.
- 469 Farlik, M., Reutterer, B., Schindler, C., Greten, F., Vogl, C., Muller, M., and Decker, T. (2010).  
470 Nonconventional initiation complex assembly by STAT and NF-kappaB transcription factors  
471 regulates nitric oxide synthase expression. *Immunity* 33, 25-34.
- 472 Foster, S.L., Hargreaves, D.C., and Medzhitov, R. (2007). Gene-specific control of inflammation by  
473 TLR-induced chromatin modifications. *Nature* 447, 972-978.
- 474 Gogos, C.A., Drosou, E., Bassaris, H.P., and Skoutelis, A. (2000). Pro- versus anti-inflammatory  
475 cytokine profile in patients with severe sepsis: a marker for prognosis and future therapeutic options.  
476 *J Infect Dis* 181, 176-180.
- 477 Guilliams, M., Mildner, A., and Yona, S. (2018). Developmental and Functional Heterogeneity of  
478 Monocytes. *Immunity* 49, 595-613.
- 479 Guo, M., Hartlova, A., Dill, B.D., Prescott, A.R., Gierlinski, M., and Trost, M. (2015). High-  
480 resolution quantitative proteome analysis reveals substantial differences between phagosomes of  
481 RAW 264.7 and bone marrow derived macrophages. *Proteomics* 15, 3169-3174.
- 482 Hagai, T., Chen, X., Miragaia, R.J., Rostom, R., Gomes, T., Kunowska, N., Henriksson, J., Park,  
483 J.E., Proserpio, V., Donati, G., Bossini-Castillo, L., Vieira Braga, F.A., Naamati, G., Fletcher, J.,  
484 Stephenson, E., Vegh, P., Trynka, G., Kondova, I., Dennis, M., Haniffa, M., Nourmohammad, A.,  
485 Lassig, M., and Teichmann, S.A. (2018). Gene expression variability across cells and species shapes  
486 innate immunity. *Nature* 563, 197-202.
- 487 Han, S.J., Ko, H.M., Choi, J.H., Seo, K.H., Lee, H.S., Choi, E.K., Choi, I.W., Lee, H.K., and Im,  
488 S.Y. (2002). Molecular mechanisms for lipopolysaccharide-induced biphasic activation of nuclear  
489 factor-kappa B (NF-kappa B). *J Biol Chem* 277, 44715-44721.
- 490 Hayden, M.S., and Ghosh, S. (2014). Regulation of NF-kappaB by TNF family cytokines. *Semin*  
491 *Immunol* 26, 253-266.
- 492 Hotchkiss, R.S., Monneret, G., and Payen, D. (2013). Sepsis-induced immunosuppression: from  
493 cellular dysfunctions to immunotherapy. *Nat Rev Immunol* 13, 862-874.
- 494 Klein, A.M., Mazutis, L., Akartuna, I., Tallapragada, N., Veres, A., Li, V., Peshkin, L., Weitz, D.A.,  
495 and Kirschner, M.W. (2015). Droplet barcoding for single-cell transcriptomics applied to embryonic  
496 stem cells. *Cell* 161, 1187-1201.
- 497 Kumar, R.M., Cahan, P., Shalek, A.K., Satija, R., Daleykeyser, A., Li, H., Zhang, J., Pardee, K.,  
498 Gennert, D., Trombetta, J.J., Ferrante, T.C., Regev, A., Daley, G.Q., and Collins, J.J. (2014).  
499 Deconstructing transcriptional heterogeneity in pluripotent stem cells. *Nature* 516, 56-61.
- 500 Levenson, E.A., Martens, C., Kanakabandi, K., Turner, C.V., Virtaneva, K., Paneru, M., Ricklefs, S.,  
501 Sosnovtsev, S.V., Johnson, J.A., Porcella, S.F., and Green, K.Y. (2018). Comparative Transcriptomic

- 502 Response of Primary and Immortalized Macrophages to Murine Norovirus Infection. *J Immunol* 200,  
503 4157-4169.
- 504 Lopez-Castejon, G., and Brough, D. (2011). Understanding the mechanism of IL-1beta secretion.  
505 *Cytokine Growth Factor Rev* 22, 189-195.
- 506 Mcadams, H.H., and Arkin, A. (1997). Stochastic mechanisms in gene expression. *Proc Natl Acad*  
507 *Sci U S A* 94, 814-819.
- 508 Netea, M.G., Joosten, L.A., Latz, E., Mills, K.H., Natoli, G., Stunnenberg, H.G., O'Neill, L.A., and  
509 Xavier, R.J. (2016). Trained immunity: A program of innate immune memory in health and disease.  
510 *Science* 352, aaf1098.
- 511 Netea, M.G., Latz, E., Mills, K.H., and O'Neill, L.A. (2015). Innate immune memory: a paradigm  
512 shift in understanding host defense. *Nat Immunol* 16, 675-679.
- 513 Newman, J.R., Ghaemmaghani, S., Ihmels, J., Breslow, D.K., Noble, M., Derisi, J.L., and  
514 Weissman, J.S. (2006). Single-cell proteomic analysis of *S. cerevisiae* reveals the architecture of  
515 biological noise. *Nature* 441, 840-846.
- 516 Nomura, F., Akashi, S., Sakao, Y., Sato, S., Kawai, T., Matsumoto, M., Nakanishi, K., Kimoto, M.,  
517 Miyake, K., Takeda, K., and Akira, S. (2000). Cutting edge: endotoxin tolerance in mouse peritoneal  
518 macrophages correlates with down-regulation of surface toll-like receptor 4 expression. *J Immunol*  
519 164, 3476-3479.
- 520 Papalexli, E., and Satija, R. (2018). Single-cell RNA sequencing to explore immune cell  
521 heterogeneity. *Nat Rev Immunol* 18, 35-45.
- 522 Paulsson, J. (2004). Summing up the noise in gene networks. *Nature* 427, 415-418.
- 523 Quinn, E.M., Wang, J., and Redmond, H.P. (2012). The emerging role of microRNA in regulation of  
524 endotoxin tolerance. *J Leukoc Biol* 91, 721-727.
- 525 Rittirsch, D., Flierl, M.A., and Ward, P.A. (2008). Harmful molecular mechanisms in sepsis. *Nat Rev*  
526 *Immunol* 8, 776-787.
- 527 Roederer, M., Nozzi, J.L., and Nason, M.C. (2011). SPICE: exploration and analysis of post-  
528 cytometric complex multivariate datasets. *Cytometry A* 79, 167-174.
- 529 Saeed, S., Quintin, J., Kerstens, H.H., Rao, N.A., Aghajani-Refah, A., Matarese, F., Cheng, S.C.,  
530 Ratter, J., Berentsen, K., Van Der Ent, M.A., Sharifi, N., Janssen-Megens, E.M., Ter Huurne, M.,  
531 Mandoli, A., Van Schaik, T., Ng, A., Burden, F., Downes, K., Frontini, M., Kumar, V., Giamarellos-  
532 Bourboulis, E.J., Ouwehand, W.H., Van Der Meer, J.W., Joosten, L.A., Wijmenga, C., Martens, J.H.,  
533 Xavier, R.J., Logie, C., Netea, M.G., and Stunnenberg, H.G. (2014). Epigenetic programming of  
534 monocyte-to-macrophage differentiation and trained innate immunity. *Science* 345, 1251086.
- 535 Sallusto, F., and Lanzavecchia, A. (2009). Heterogeneity of CD4+ memory T cells: functional  
536 modules for tailored immunity. *Eur J Immunol* 39, 2076-2082.
- 537 Satija, R., and Shalek, A.K. (2014). Heterogeneity in immune responses: from populations to single  
538 cells. *Trends Immunol* 35, 219-229.
- 539 Schwartz, R.H. (2003). T cell anergy. *Annu Rev Immunol* 21, 305-334.
- 540 Seeley, J.J., and Ghosh, S. (2017). Molecular mechanisms of innate memory and tolerance to LPS. *J*  
541 *Leukoc Biol* 101, 107-119.

- 542 Shalek, A.K., Satija, R., Adiconis, X., Gertner, R.S., Gaublomme, J.T., Raychowdhury, R., Schwartz,  
543 S., Yosef, N., Malboeuf, C., Lu, D., Trombetta, J.J., Gennert, D., Gnirke, A., Goren, A., Hacohen, N.,  
544 Levin, J.Z., Park, H., and Regev, A. (2013). Single-cell transcriptomics reveals bimodality in  
545 expression and splicing in immune cells. *Nature* 498, 236-240.
- 546 Tanabe, K., Matsushima-Nishiwaki, R., Yamaguchi, S., Iida, H., Dohi, S., and Kozawa, O. (2010).  
547 Mechanisms of tumor necrosis factor-alpha-induced interleukin-6 synthesis in glioma cells. *J*  
548 *Neuroinflammation* 7, 16.
- 549 Tay, S., Hughey, J.J., Lee, T.K., Lipniacki, T., Quake, S.R., and Covert, M.W. (2010). Single-cell  
550 NF-kappaB dynamics reveal digital activation and analogue information processing. *Nature* 466,  
551 267-271.
- 552 Vergadi, E., Vaporidi, K., and Tsatsanis, C. (2018). Regulation of Endotoxin Tolerance and  
553 Compensatory Anti-inflammatory Response Syndrome by Non-coding RNAs. *Front Immunol* 9,  
554 2705.
- 555 Yao, Y., Jeyanathan, M., Haddadi, S., Barra, N.G., Vaseghi-Shanjani, M., Damjanovic, D., Lai, R.,  
556 Afkhami, S., Chen, Y., Dvorkin-Gheva, A., Robbins, C.S., Schertzer, J.D., and Xing, Z. (2018).  
557 Induction of Autonomous Memory Alveolar Macrophages Requires T Cell Help and Is Critical to  
558 Trained Immunity. *Cell* 175, 1634-1650 e1617.
- 559 Zhu, J., and Paul, W.E. (2010). Heterogeneity and plasticity of T helper cells. *Cell Res* 20, 4-12.

560

## 561 **Figure Legends**

### 562 **Figure 1: Macrophage community AIH is dependent on LPS dose**

563 A. Flow cytometry gating to show 16 sub-populations determined based on TNF, IL-6, pro-IL-1b and  
564 NOS2.

565 B. Pie charts represent the community composition at 16 hours post stimulus with the indicated doses  
566 of LPS for RAW264.7. Data representative of three independent experiments.

567

### 568 **Figure 2: Macrophage community AIH kinetics for BMDMs**

569 Pie charts represent the community composition at 8, 12 and 16 hours post stimulus with the  
570 indicated doses of LPS for BMDMs. BMDMs are pre-gated on Live/Singlets/FSC-  
571 SSC/CD11b+F4/80+ population. Data representative of three independent experiments.

572

### 573 **Figure 3: Altered AIH kinetics in macrophages responding to a second LPS challenge correlate** 574 **with hypo-responsiveness**

575 A. Averaged pie charts representing 3 independent experiments at the indicated timepoints post LPS  
576 challenge (1000ng/ml) of RAW264.7 macrophages pre-treated for 24 hours with either media  
577 (Media/1000), or 10ng/ml LPS (10/1000), or 1000ng/ml LPS (1000/1000). Legend indicates  
578 expression status for TNF, IL-6, pro-IL-1b and NOS2 subset.

579 B. As in A, but for BMDMs.

580

581 **Figure 4: Mathematical modelling with 3 or 4 non-responsive states (NoRM) can describe**  
582 **hyporesponsiveness**

583 A. Schematic representation of states and constants used in a 2-state model. Macrophage can be in a  
584 negative or positive state of making an inflammatory response protein.

585 B. Schematic representation of states and constants used in the NoRM mathematical model.  
586 Macrophage can be in a negative, positive, non-responsive (NRS).

587 C. Same as B but with inclusion of a 4th non-responsive permanent (NRPS) state.

588

589 **Figure 5: Transitions between distinct non-responding macrophage subsets underpin responses**  
590 **to LPS**

591 A. Overall cell-state compositions for TNF based on the NoRM model prediction when 3-states (ie  
592  $\gamma_2=0$ ) or 4-states are modelled post in silico stimulation with a single dose of LPS of 1000ng/ml, 12  
593 hours BMDM or 16 hours RAW264.7) and two doses of LPS (1000ng/ml 0-24 hours + 1000ng/ml,  
594 12 hours BMDM or 16 hours RAW264.7).

595 B. Same as above but for pro-IL-1 $\beta$ .

596

597

598

599

600

601

**A**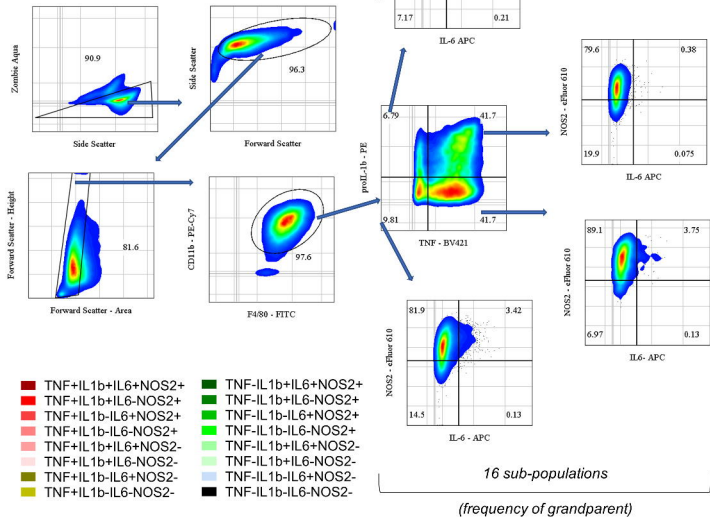**B**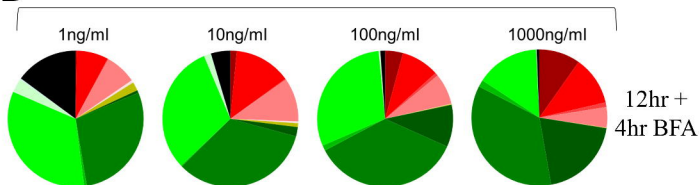

1ng/ml

10ng/ml

100ng/ml

1000ng/ml

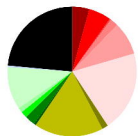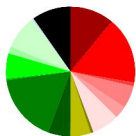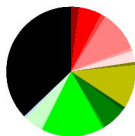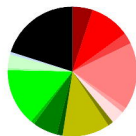4hr +  
4hr BFA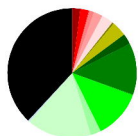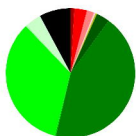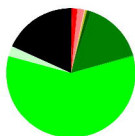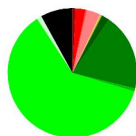8hr +  
4hr BFA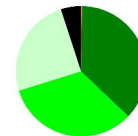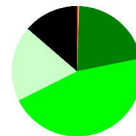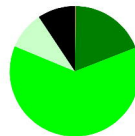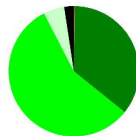12hr +  
4hr BFA

■ TNF+IL1b+IL6+NOS2+

■ TNF+IL1b+IL6-NOS2+

■ TNF+IL1b-IL6+NOS2+

■ TNF+IL1b-IL6-NOS2+

■ TNF+IL1b+IL6+NOS2-

■ TNF+IL1b+IL6-NOS2-

■ TNF+IL1b-IL6+NOS2-

■ TNF+IL1b-IL6-NOS2-

■ TNF-IL1b+IL6+NOS2+

■ TNF-IL1b+IL6-NOS2+

■ TNF-IL1b-IL6+NOS2+

■ TNF-IL1b-IL6-NOS2+

■ TNF-IL1b+IL6+NOS2-

■ TNF-IL1b+IL6-NOS2-

■ TNF-IL1b-IL6+NOS2-

■ TNF-IL1b-IL6-NOS2-



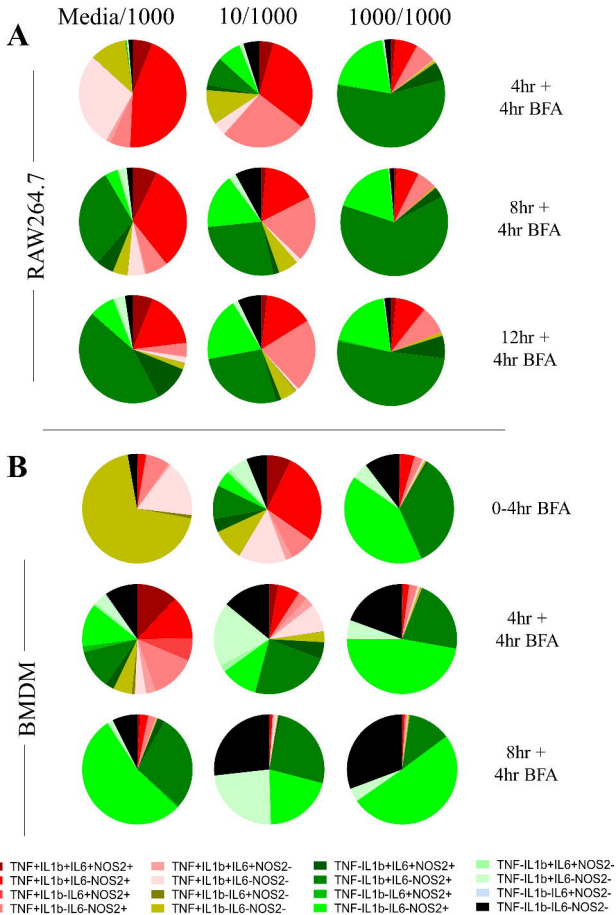

**A**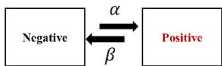**B**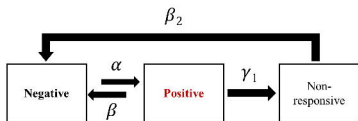**C**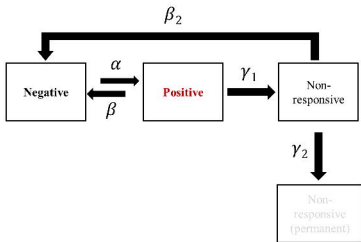

**A****3-state****4-state****RAW264.7****BMDM****RAW264.7****BMDM**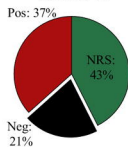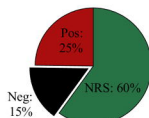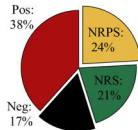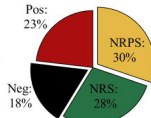**Post primary TNF**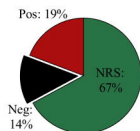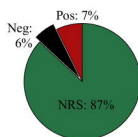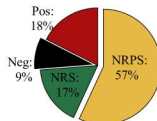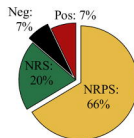**Post secondary TNF****B**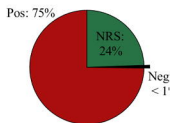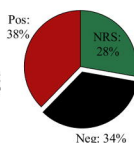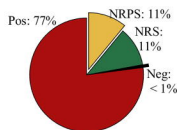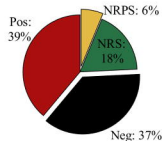**Post primary pro-IL-1b**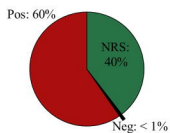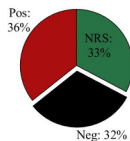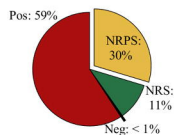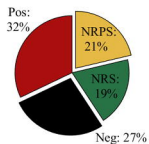**Post secondary pro-IL-1b**
